# Supplementary material for: Yeast Smy2 and its human homologs GIGYF1 and -2 regulate Cdc48/VCP function during transcription stress
Source: PubMed Central journal article supplement (PMC9638028; doi:10.1016/j.celrep.2022.111536), 2022-10-25
Supplement: mmc1.pdf [file mmc1.pdf]

**Cell Reports, Volume 41**

**Supplemental information**

**Yeast Smy2 and its human homologs GIGYF1 and -2**

**regulate Cdc48/VCP function**

**during transcription stress**

**Michelle Harreman Lehner, Jane Walker, Kotryna Temcinaite, Anna Herlihy, Michael Taschner, Adam C. Berger, Anita H. Corbett, A. Barbara Dirac Svejstrup, and Jesper Q. Svejstrup**

## Supplemental Figures with Legends

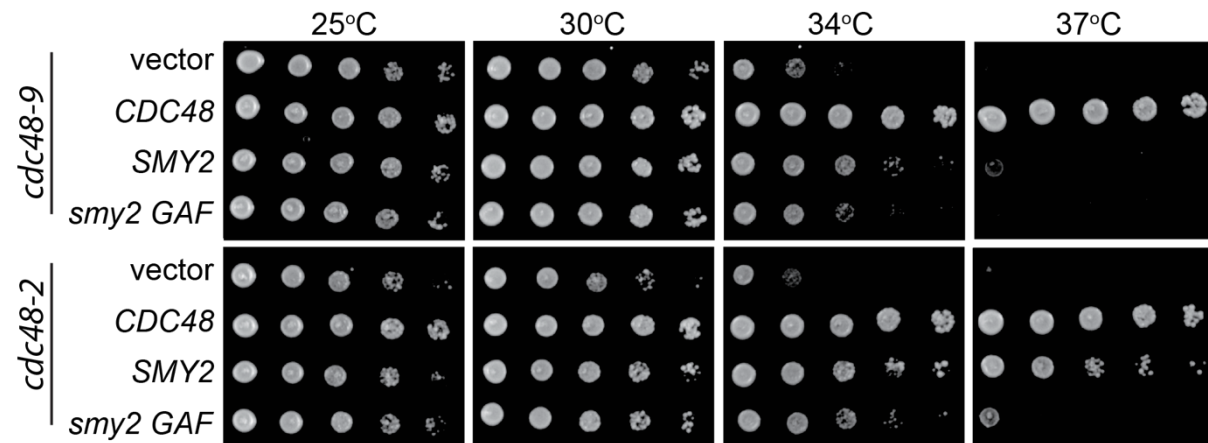

**Supplementary Figure S1, related to Figure 2. *SMY2* also affect growth of other *cdc48* mutants.** Dilution series of *cdc48-9* and *cdc48-2* yeast cells (carrying the indicated *SMY2* or *CDC48* plasmids) plated on minimal media and grown at the stated temperatures for 2-4 days.

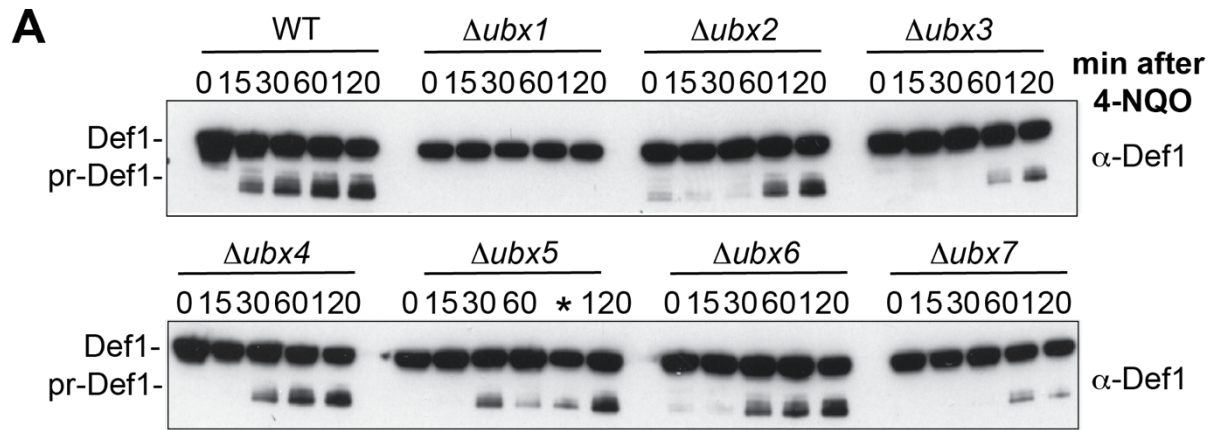

**Supplementary Figure S2, related to Figure 5. Effects of *UBX* genes and *SMY2*.** A. Western blot analysis of Def1 from extracts of wild type and deletion strains of the seven yeast Ubxs. Logarithmically growing cells were incubated with 4-NQO for the indicated times. \*Denotes a gel loading error. There is variability in Def1 processing assays, but only *ubx1* deletion consistently had a dramatic effect in such experiments.

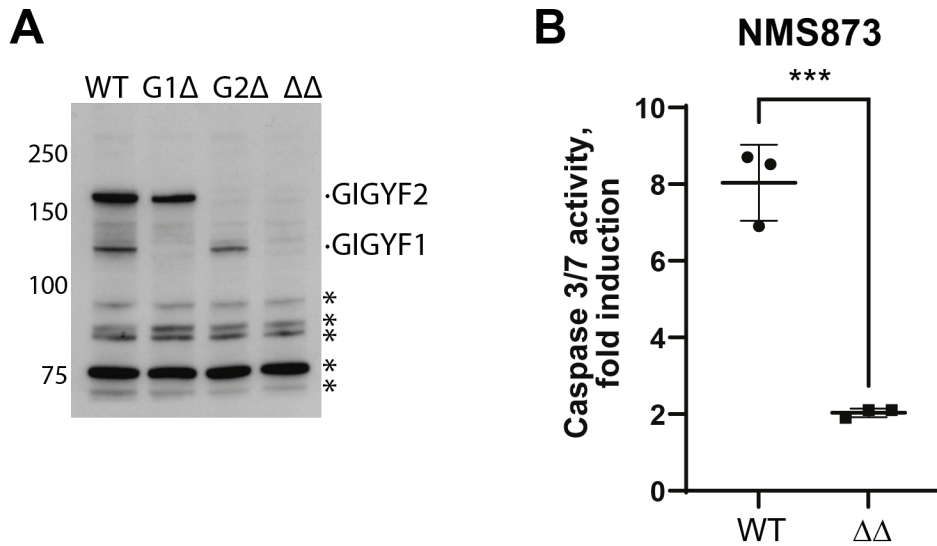

**Supplementary Figure S3, related to Figures 6 and 7. A *GIGYF1/2* knockout and its effect on p97/VCP inhibitor. A.** Step-wise generation of *GIGYF1* and *GIGYF2* double knockout cells. **B.** The apoptosis-inducing effect of p97/VCP inhibitor NMS873 and the dependence on the GIGYF proteins, 15 hours after adding inhibitor. Only clone C12 tested. Data from 3 biological replicates; data is average of 3 independent wells in each condition in each experiment. \*\*\*P-value <0.001. Results were analysed using GraphPad Prism 9 Software and statistical analysis by the unpaired t-test showed a p-value of 0.0005.

**Supplementary Table S2. Oligonucleotides.** Related to STAR Methods and Key Resources Table.

| REAGENT OR RESOURCE                    | SOURCE                                                                                             | IDENTIFIER |
|----------------------------------------|----------------------------------------------------------------------------------------------------|------------|
| Forward SMY2                           | CCAATATCTACCGCCAGTGATGC                                                                            | N/A        |
| Reverse SMY2                           | GGGTAGACGCATCTTATTACCCGC                                                                           | N/A        |
| Forward Smy2 deletion                  | CCTTGAGCTTTTACCTTCCTTCCTCCCCTATATACTC<br>AACTTCTCAGCCCACATCAATATCCGGTTCTGCTGCTAG<br>T              | N/A        |
| Reverse Smy2 deletion                  | GTATATAACAATAACAATAAATGATAAAGAAATATGCAG<br>TGAAAAGAAAAAATTATGAAGCTTTTCCTTCCTCGAGGC<br>CAG<br>AAGAC | N/A        |
| Forward FLAG-Smy2                      | CGGATCCACTAGTAACGGCCGCAATGGATTACAAGGA<br>TGACGACGATAAGGGCGGAATAGCACCAGACTCGCAA<br>GATT<br>ATTCG    | N/A        |
| Reverse FLAG-Smy2                      | TCCGCCCTTATCGTCGTCATCCTTGTAATCCATTGGCGG<br>CCGTTACTAGTGGATCCGAGCTCG                                | N/A        |
| Forward Smy2 GAF mutant                | CATAGGTGGCGCTTTTGCTTCAACC                                                                          | N/A        |
| Reverse Smy2 GAF mutant                | TACCATTGTGACATCATTG                                                                                | N/A        |
| Forward GST-Smy2 GYF domain            | GCAGGGCTGGCAAGCCACGTTTGGTGG                                                                        | N/A        |
| Reverse GST-Smy2 GYF domain            | GACCGTCTCCGGGAGCTGCATGTGTCAGAGG                                                                    | N/A        |
| Forward GST-Smy2 GYF domain GAF mutant | GGTCCATTTACTACCCAAATGATGTCACAATGGTACATA<br>GGTGGCGCTTTTGCTTCAACCC                                  | N/A        |
| Reverse GST-Smy2 GYF domain GAF mutant | CCCAATCTTGAAATCTGAAGGGTTGAAGCAAAGCGCC<br>ACCTATGTACCATTGTGACATCATTG                                | N/A        |
| Forward FLAG-Cdc48 integration         | CCACTAGCTAAAAAGTGGAACGATCATTCAAGAGATCC<br>CCGTTATATGCCAGGTATATTTTTATTTAAATCGTAA<br>ATT<br>CAAGTC   | N/A        |
| Reverse FLAG-Cdc48 integration         | GACTTGAATTTACGATTTAAAATAAAAATATACCTGGCA<br>TATAACCGGGGATCTCTTGAATGATCGTTCCACTTTTTA<br>GC<br>TAGTGG | N/A        |
| Forward Cdc48                          | CTGGCAAGCTTGAAGTAAAAGGACAATCAGCACGCCTT<br>CC                                                       | N/A        |
| Reverse Cdc48                          | CGGATCTCGAGCCAATAACATTAGCGACAAGTTTTCTCC<br>GCG                                                     | N/A        |
| Forward Pre1-myc                       | GGGCGTCATTGTTAAAATCGTGGATAAAGATGGCATAA<br>GACAAGTAGATGACTTCCAGGCACAGTCCGGTTCTGCT<br>GCTA<br>GT     | N/A        |
| Reverse Pre1-myc                       | GGAAGATAATTACTTTAGTATATCATTAGCAATCACCTT<br>TTCCGTGTGATTACACTGAATATCTTTCACCTCGAGGCC<br>AG<br>AAGAC  | N/A        |

|                    |                                                   |     |
|--------------------|---------------------------------------------------|-----|
| Forward FLAG-Spt23 | GATTATAAAGATGACGATGACAAGATGATGAGTGGCAC<br>AGGAAAC | N/A |
| Reverse FLAG-Spt23 | CTTGTCATCGTCATCTTTATAATCCTTATCGTCGTCATCC<br>TTG   | N/A |
| GIGYF1 gRNA        | TGACTACCGTTATGGGCGAG                              | N/A |
| Forward GIGYF1     | ACTCGAGCTTCCCATCTCCT                              | N/A |
| Reverse GIGYF1     | CCGAAATAAGCACCCCCAGA                              | N/A |
| GIGYF1 Sequencing  | GGCGGGAGTGAGGACCCAGGC                             | N/A |
| GIGYF2 gRNA        | ATTTCTGCCTATCCTCCAGG                              | N/A |
| Forward GIGYF2     | TCACTTGAGAAGCTGGGGAGT                             | N/A |
| Reverse GIGYF2     | AGGATGGTTCCCAATGTCCTT                             | N/A |
| GIGYF2 Sequencing  | CTGGGGAGTATTGACTGGGGT3                            | N/A |
